1 **Affect and post-COVID-19 symptoms in daily life: An exploratory**  
2 **experience sampling study**

3 Gerko Schaap<sup>1\*</sup>, Marleen Wensink<sup>1</sup>, Carine J. M. Doggen<sup>2,3</sup>, Job van der Palen<sup>4,5</sup>, Harald E.  
4 Vonkeman<sup>1,6</sup>, and Christina Bode<sup>1</sup>

5

6 <sup>1</sup> Department of Psychology, Health and Technology, University of Twente, Enschede, The Netherlands

7 <sup>2</sup> Department of Health Technology and Services Research, Technical Medical Centre, University of  
8 Twente, Enschede, The Netherlands

9 <sup>3</sup> Clinical Research Centre, Rijnstate Hospital, Arnhem, The Netherlands

10 <sup>4</sup> Department of Epidemiology, Medisch Spectrum Twente, Enschede, The Netherlands

11 <sup>5</sup> Section of Cognition, Data and Education, University of Twente, Enschede, The Netherlands

12 <sup>6</sup> Department of Rheumatology and Clinical Immunology, Medisch Spectrum Twente, Enschede, The  
13 Netherlands

14

15 \*Corresponding author

16 E-mail: [g.schaap@utwente.nl](mailto:g.schaap@utwente.nl) (GS)

17

## Affect and Post-COVID-19 Symptoms in Daily Life

### 18 **Abstract**

19           Insight into the daily life experiences of patients with post-COVID-19 syndrome is lacking. The  
20 current study explored temporal fluctuations of and associations between positive and negative affect  
21 and symptoms throughout the day in previously hospitalised post-COVID-19 patients using an  
22 experience sampling methodology. Ten participants (age: median = 60, interquartile range = 9 years;  
23 50% women ; 80%  $\geq 1$  comorbidity; 8–12 months since hospital discharge) filled out brief online  
24 questionnaires, six times a day for 14 consecutive days. Positive and negative affect, and self-reported  
25 symptoms (physical and mental fatigue, cognitive functioning, dyspnoea, and pain) were assessed in  
26 real-time. Primarily, graphs were analysed to assess the individual longitudinal courses of and  
27 (concurrent and time-lagged) associations between affect and symptoms. Secondly, correlations or  
28 multilevel linear regression models were used to support these interpretations. Visual assessment  
29 showed limited temporal fluctuation in affect and symptoms. All symptoms appeared to associate  
30 positively with each other (correlations between .26 and .85). Positive affect was associated with lower  
31 symptoms severity ( $\beta$ 's between -.28 and -.67), and negative affect with higher symptoms severity ( $\beta$ 's  
32 between .24 and .66). Time-lagged analyses showed that – adjusted for residual symptom severity of  
33 prior measurements – both types of affect predicted symptom severity two hours later ( $\beta$ 's between -.09  
34 and -.31 for positive affect; between .09 and .28 for negative affect). These findings suggest that positive  
35 and negative affect may play important roles in post-COVID-19 symptom experience and temporal  
36 fluctuation.

37

38 **Keywords:** Post-COVID-19 syndrome; long COVID; symptoms; affect; Experience Sampling  
39 Methodology; Ecological Momentary Assessment

## 40 **Introduction**

41 While most people recover from a SARS-CoV-2 infection, a substantial group struggles with  
42 persistent symptoms. These sequelae are often referred to as long-COVID or as post-COVID-19  
43 syndrome, which can be defined as “signs and symptoms that developed during or after an infection  
44 consistent with COVID-19, continue for more than 12 weeks and are not explained by an alternative  
45 diagnosis” [1]. Estimated prevalence ranges between 6 to 45 percent of COVID-19 survivors [2-4],  
46 depending on definitions, populations, vaccination status, and SARS-CoV-2 variants within these  
47 samples. Most frequently reported post-COVID-19 symptoms include fatigue, cognitive dysfunction or  
48 brain fog, respiratory problems such as dyspnoea (breathlessness), chronic pain, and loss of sense of  
49 smell; often co-occurring [3, 5-9]. Previous research is mostly limited to cross-sectional or cohort  
50 studies, and few studies looked into the severity of these symptoms, their daily fluctuations, and the  
51 interrelations between these symptoms. Similarly, while reviews [6, 8] and qualitative studies [10-13]  
52 reported the effects on mental health and health-related quality of life, the daily fluctuations over time  
53 of positive and negative affect in post-COVID-19 patients have not yet been investigated.

54 Affect may play an important role in the severity, daily course, and potentially management of  
55 post-COVID-19 symptoms. One relevant framework to understand the associations between affect and  
56 symptoms is the Broaden-and-Build theory of positive emotions [14, 15]. Negative emotions narrow  
57 patients’ attention and behaviours towards specific action tendencies necessary for survival, such as fear  
58 evoking an urge to escape [16]. In contrast, positive emotions can broaden patients’ perspectives and  
59 approaches and help build personal physical, cognitive, social and psychological resources [14]. For  
60 health, this translates into the risk for negative affect to restrict one’s attention on symptoms, whereas  
61 positive affect may help patients to find additional resources to cope with their symptoms and aid with  
62 self-management in general. This relationship between affect and symptoms has been found in many  
63 patient populations, and the directions of these relationships can be surprising; while it seems common  
64 sense that negative affect follows from increased symptom severity, the reverse can also be true. Both  
65 negative and positive affect have been found to be bidirectionally associated with or predictive of  
66 chronic symptoms such as fatigue, dyspnoea, and pain in various patient populations [17-22]. These

## Affect and Post-COVID-19 Symptoms in Daily Life

67 studies mostly made use of cross-sectional designs and investigated these relations at a trait level or  
68 relatively stable level, and hence provide little insight into short-term associations. In addition,  
69 investigating whether affect informs an increase or decrease of symptom severity shortly later allows  
70 for a richer, more detailed and nuanced understanding of illness experiences on a daily level. Moreover,  
71 this understanding may guide in identifying opportunities for more advanced interventions; advanced in  
72 the sense of potential for tailoring and personalisation. Currently it is not known whether positive and  
73 negative affect are predictive of post-COVID-19 symptoms, and how these are experienced real-time  
74 over the day.

75 To address the gaps in current knowledge, this observational study aimed to explore the daily  
76 courses of and interrelations between positive and negative affect and post-COVID-19 symptom  
77 severity, such as of fatigue, cognitive dysfunction, dyspnoea, and pain. An Experience Sampling  
78 Methodology (ESM) has been applied, which allowed investigating these aspects in daily life through  
79 repeated real-time assessments. Moreover, this method helps overcome recall bias, and due to the  
80 repeated observations within participants, allows for rich and robust insights in patients' daily  
81 experiences, even in small patient samples [23]. The following research questions were to assess: (1)  
82 temporal fluctuations of affect and post-COVID-19 symptoms; (2) whether these symptoms were  
83 associated with (a) positive and (b) negative affect measured concurrently; and (3) whether symptoms  
84 were predicted by (a) positive and (b) negative affect measured at an earlier timepoint using time-lagged  
85 analyses.

86

## 87 **Methods**

### 88 **Recruitment**

89 This study is part of a larger, on-going cohort study on the long-term impact of severe COVID-  
90 19 requiring hospitalisation (registered at ClinicalTrials.gov; NCT05813574). For the present study,  
91 participants were selected based on self-reported health status three months after hospital discharge and  
92 their self-assessed health status at the time of recruitment. Formerly hospitalised COVID-19 patients  
93 who indicated their health to be much worse compared to a year ago on the Dutch Short Form Health

## Affect and Post-COVID-19 Symptoms in Daily Life

94 Survey (SF-36)[24] were selected for an interview [13]. During the interview, approximately 9 months  
95 after hospital discharge, self-perceived health status was reassessed, and participants were screened for  
96 symptoms (e.g. fatigue). If participants still suffered from post-COVID-19-associated symptoms, they  
97 were invited for the present study. Out of the 16 selected candidates, 11 were willing to participate.

98 Inclusion criteria were: a) having been discharged from hospital after polymerase chain reaction-  
99 confirmed acute COVID-19; b) persisting, fluctuating symptoms attributed by the participant to post-  
100 COVID-19 syndrome; c)  $\geq 18$  years of age; d) proficiency in Dutch; and e) willingness to install a  
101 smartphone-based measurement app. Participants were excluded from analysis in case of compliance  
102 rates  $< 30\%$  of the daily assessments [23]. All participants provided written informed consent, and the  
103 Medisch Spectrum Twente Institutional Review Board (K20-30) and the Ethics Committee Behavioural,  
104 Management and Social Sciences of the University of Twente, the Netherlands (210799) approved the  
105 study.

106

## 107 **Procedure and measurements**

108 Using an ESM setup, this study set out to examine daily fluctuations of and associations between  
109 affect and post-COVID-19 symptom severity. Data were collected between September 5 and October  
110 27, 2021, using the Ethica platform ([ethicadata.com](https://ethicadata.com)) and the related Ethica smartphone application.  
111 ESM data consisted of daily questionnaires on symptoms, feelings, and behaviours. Additional data  
112 were collected, but were beyond the scope of this study and are discussed elsewhere [25]. See Appendix  
113 S1 for the complete questionnaires in Dutch (original) and English (translated). Demographic and  
114 health-related characteristics were retrieved from hospital medical records with participants' approval.

115 Participants were followed for 14 consecutive days via seven daily self-report questionnaires  
116 prompted by a beep signal, of which six were relevant for this study. These short questionnaires – taking  
117 approximately two minutes – were prompted semi-randomly within two-hour intervals at 08.00 – 09.59,  
118 10.00 – 11.59, 12.00 – 13.59, 14.00 – 15.59, 16.00 – 17.59, and 18.00 – 19.59 (i.e. signal-contingent  
119 sampling). Each notification expired after 15 minutes to prevent reactivity (i.e. participants 'preparing  
120 themselves' for the prompts) without being too inconvenient [23, 26].

## Affect and Post-COVID-19 Symptoms in Daily Life

121           The questionnaires assessed, in fixed order, symptom severity and affect. Fatigue – assessed as  
122 physical fatigue and mental fatigue – and dyspnoea were observed real-time using statements (“right  
123 now, I feel shortness of breath”) that could be answered using 7-point Likert-type answers: 1 – ‘strongly  
124 disagree’ to 7 – ‘strongly agree’. Cognitive function was assessed by asking for clarity of thought (“how  
125 is your ‘thinking’ (concentration, memory, attention) right now?”) on a visual analogue scale (VAS): 0  
126 – ‘slow and difficult’ to 10 – ‘sharp and alert’. This scale was reversed for analysis (cognitive  
127 dysfunction), so that higher scores indicated higher severity. Pain was assessed first by asking if the  
128 participant experienced pain ‘right now’ (presence of pain). If affirmative, four additional prompts  
129 opened up to assess the severity of headache, joint pain, chest pain, and pain ‘elsewhere in the body’ or  
130 non-specific, which could be answered on four VAS: 0 – ‘no pain’ to 10 – ‘worst imaginable pain’.  
131 However, as these pains varied too much between participants, the VAS were omitted from further  
132 analysis. Nevertheless, their pain courses over time per participant were visualised and are reported in  
133 Appendix S4. Affect was assessed using statements on five negative (anxious, gloomy, sad, irritable,  
134 and disappointed) and five positive feelings (excited, relaxed, satisfied, thankful, and joyful; e.g. “right  
135 now, I feel satisfied”), to be answered on a 7-point Likert-type scale: 1 – ‘strongly disagree’ to 7 –  
136 ‘strongly agree’. Two mean scales of the five positive affect items and five negative affect items were  
137 created as intercorrelations within these constructs were very high (both: Cronbach’s  $\alpha = .96$ ).  
138 Additionally, a categorical variable (affect category) was made to indicate whether participants were  
139 predominantly positive (positive affect >4), predominantly negative (negative affect >4) or neither  
140 predominantly positive nor negative (‘neutral’). All items were based on previously validated  
141 questionnaires or ESM studies [27-34].

142

## 143 **Data analysis**

144           ESM data consisted of observations (level 1) within days (level 2) within individuals (level 3).  
145 To make full use of the richness of these observations, data were primarily assessed visually.  
146 Observations were plotted for exploration per participant (affect and symptoms), per symptom by affect

## Affect and Post-COVID-19 Symptoms in Daily Life

147 category, and per symptom at the current time (t) with affect category of the previous time point (lagged  
148 t-1). The graphs were plotted in RStudio version 23.03.0 +386 [35].

149 Additionally, statistical models were used to support these interpretations. Statistical evidence  
150 for associations between symptoms were explored using personal averages (Person Mean) of each  
151 participant to account for potential within-person fluctuations. Spearman rank correlations ( $r_s$ ) were used  
152 to account for non-parametric distributions and the small sample size. To assess potential associations  
153 between affect and symptoms structured as two levels (observations nested within participants),  
154 multilevel linear regression (MLR) models via the SPSS MIXED procedure were used. These models  
155 also account for randomly missing observations, which is common in ESM studies. The models  
156 accounted for participants (*subjects*) and timepoints (*repeated measures*), and were set up with restricted  
157 maximum likelihood estimations and first-order autoregressive (AR1) covariance structure, which was  
158 found to be best fitting according to the Akaike Information Criterion (AIC). As variables were  
159 measured with different scales, Z-scores were used for analysis and to retrieve standardised regression  
160 estimates. In the concurrent MLR models, each symptom was the outcome variable with either positive  
161 affect or negative affect as the fixed covariate. Due to a strong correlation between positive affect and  
162 negative affect ( $r_s = -.82$ ), these variables were examined separately in univariate MLR. To examine the  
163 prospective associations, positive and negative affect were lagged to the previous timepoint (t-1) in  
164 relation to the timepoint of the symptom. For these models, each first symptom measurement of the day  
165 was omitted, as the time between prior affect and symptom was too long (e.g. affect at T6 (e.g. 18.30)  
166 was adjusted to not predict an effect on fatigue next day at T7 (08.30)). Additionally, the outcome  
167 symptom was lagged t-1 and added as fixed covariate, to adjust for a continuance or residual experience  
168 of the symptom. Statistical significance was assessed using 95% confidence intervals and  $\alpha < .05$ .  
169 Standardised regression estimates were interpreted as small ( $>.1$ ), medium ( $>.3$ ) or large ( $>.5$ ) effect  
170 size following Cohen's guidelines [36]. Descriptive statistics are presented in absolute number and  
171 percentages or median (*Mdn*) and interquartile range (*IQR*). IBM SPSS Statistics 28 was used for all  
172 statistical analyses.

173

## 174 **Results**

### 175 **Sample characteristics**

176 After removing one participant with a compliance rate <30%, the final sample comprised 10  
177 participants, who were between 48 and 76 (*Mdn* = 60, *IQR* = 9) years old and half of whom were women  
178 (*n* = 5). Five participants had one comorbidity, three participants had two or more and two had no  
179 comorbidities. All but two participants (80%) were overweight (Body Mass Index  $\geq 25$ ; *Mdn* = 29.0,  
180 *IQR* = 14.6, *Min* = 22.0, *Max* = 41.8). Observations were made between 8 and 12 (*Mdn* = 10, *IQR* = 2)  
181 months after hospital discharge. Compliance rates of participants varied between 32 and 92% (*Mdn* =  
182 63.5%, *IQR* = 40.1%), with in total 502 completed questionnaires.

183

### 184 **Courses of post-COVID symptoms and affect**

185 Visual assessment of the daily average symptom severity per participant (Fig 1) suggested that  
186 there were clear between-person differences in experiences of symptoms. Furthermore, physical and  
187 mental fatigue, dyspnoea and, to a lesser extent, cognitive dysfunction associated with each other over  
188 time on a daily level: an increase in one symptom co-occurred with an increase in the other. This  
189 interpretation was supported by correlational analyses of person mean severities ( $r_s$  between .37 and .85,  
190  $p < .001$ ; Table 1). For example, if a participant tends to experience physical fatigue, they also tend to  
191 experience cognitive dysfunction ( $r_s(8) = .80$ ,  $p < .001$ ). Although less obvious from the visual  
192 assessment, presence of pain likewise was weakly to moderately correlated to higher severity of other  
193 symptoms ( $r_s$  between .26 and .54,  $p < .001$ ; Table 1). Visual assessment of the graphs (see Fig 2 for the  
194 course of physical fatigue per participant; see S2 for courses of mental fatigue, cognitive dysfunction,  
195 dyspnoea and pain per participant) revealed that symptoms fluctuated over time to various degrees.  
196 Cognitive dysfunction and pain showed the least variability and were mostly stable within participants.  
197 Aside from that, no clear temporal patterns were observed within participants. To illustrate, while  
198 physical fatigue often was lower in the afternoon for participant B, this was not necessarily the case  
199 every day (Fig 2).



## Affect and Post-COVID-19 Symptoms in Daily Life

200 **Fig 1. Daily average symptom severity over 14 days for participants A – J.** Pain presence was a  
201 dichotomous variable, with 1 = present and 0 = absent. Consequently, scores of e.g. 0.8 indicate that a  
202 participant did mostly but not always experience pain that day. See Fig 2 and Appendix S2 for more  
203 detailed insights in symptom courses.

204 **Fig 2. Course of physical fatigue over 14 days with corresponding affect per participant A – J.**

205

206 **Table 1. Spearman correlations between symptoms at person mean level.**

|                       | Physical<br>fatigue | Mental<br>fatigue | Cognitive<br>dysfunction | Dyspnoea |
|-----------------------|---------------------|-------------------|--------------------------|----------|
| Physical fatigue      | -                   |                   |                          |          |
| Mental fatigue        | .76***              | -                 |                          |          |
| Cognitive dysfunction | .73***              | .37***            | -                        |          |
| Dyspnoea              | .88***              | .53***            | .66***                   | -        |
| Pain presence         | .25***              | .32***            | .27***                   | .37***   |

207 \*\*\* =  $p < .001$ .

208

209 Affect was mostly stable within participants, with two participants (C and I, Fig 2; see S4 for  
210 courses of and interrelations between positive and negative affect per participant) predominantly  
211 experiencing negative affect. No evidence for emotional instability was found (S4).

212

## 213 **Associations between affect and post-COVID symptoms**

### 214 **Concurrent associations**

215 Overall, negative affect co-occurred with higher severity in all symptoms (Fig 2 and S2).  
216 Additionally, experiencing neither predominantly positive nor negative ('neutral') affect co-occurred  
217 with higher symptom severity. Conversely, predominantly positive affect co-occurred more often with

## Affect and Post-COVID-19 Symptoms in Daily Life

218 lower symptom severity. Pain seemed to be present regardless of affective tendencies in most  
 219 participants. MLR models (Table 2) supported these assessments for all associations, and seem to  
 220 suggest that both affects influence symptoms to a similar extent. For example, cognitive dysfunction  
 221 was (almost) strongly and significantly associated negatively with positive affect ( $\beta = -.46$ ) and  
 222 positively with negative affect ( $\beta = .51$ ).

223

224 **Table 2. Overview of 10 univariate models of positive and negative affect as concurrent predictors**  
 225 **of symptoms.**

| Outcome               | Positive affect |      |              | Negative affect |      |            |
|-----------------------|-----------------|------|--------------|-----------------|------|------------|
|                       | $\beta$         | SE   | 95%CI        | $\beta$         | SE   | 95%CI      |
| Physical fatigue      | -.67            | 0.04 | -.75 to -.59 | .59             | 0.05 | .49 to .69 |
| Mental fatigue        | -.59            | 0.05 | -.69 to -.49 | .66             | 0.05 | .56 to .76 |
| Cognitive dysfunction | -.46            | 0.05 | -.55 to -.36 | .51             | 0.06 | .39 to .62 |
| Dyspnoea              | -.49            | 0.05 | -.60 to -.39 | .37             | 0.07 | .24 to .50 |
| Pain presence         | -.28            | 0.06 | -.39 to -.16 | .24             | 0.07 | .10 to .38 |

226 Standardised estimates of fixed covariate (either positive or negative affect) on outcome (symptom) in  
 227 univariate multilevel linear regression models. All associations were statistically significant,  $p < .001$ .  
 228 SE = standard error; 95%CI = 95% confidence intervals presented with respectively lower and upper  
 229 limits.

230

### 231 Time-lagged associations

232 To explore whether symptoms were influenced by affect, positive and negative affect were  
 233 lagged to the prior observation (t-1; visualisations in S3). As affect was relatively stable within  
 234 participants, influences are inconclusive, but a change from positive to ‘neutral’ or negative affect might  
 235 indicate a worsening of symptom severity (see e.g. Participant A). MLR models showed that although  
 236 symptom severity often was a continuance or remnant of previous measurement – especially for the  
 237 more stable symptoms such as cognitive dysfunction and presence of pain – both positive and negative

Affect and Post-COVID-19 Symptoms in Daily Life

238 affect still were significant but mostly weak predictors (Table 3), suggesting a small influence of affect  
239 on symptoms two hours later. Post-hoc analyses showed that, in line with the stable affect trajectories,  
240 time-lagged symptoms were not significant predictors of positive and negative affect two hours later.

241

242 **Table 3. Overview of 10 multivariate models of positive and negative affect as time-lagged**  
243 **predictors of symptoms.**

| Outcome               | Predictor                 | Positive affect   |      |              | Negative affect  |      |            |
|-----------------------|---------------------------|-------------------|------|--------------|------------------|------|------------|
|                       |                           | $\beta$           | SE   | 95%CI        | $\beta$          | SE   | 95%CI      |
| Physical fatigue      | Affect t-1                | -.31              | 0.05 | -.41 to -.20 | .27              | 0.05 | .17 to .36 |
|                       | Physical fatigue t-1      | .46               | 0.05 | .36 to .57   | .51              | 0.05 | .41 to .60 |
| Mental fatigue        | Affect t-1                | -.18              | 0.05 | -.27 to -.08 | .28              | 0.05 | .19 to .38 |
|                       | Mental fatigue t-1        | .65               | 0.05 | .56 to .74   | .54              | 0.05 | .45 to .64 |
| Cognitive dysfunction | Affect t-1                | -.14              | 0.04 | -.21 to -.07 | .12              | 0.03 | .06 to .19 |
|                       | Cognitive dysfunction t-1 | .82               | 0.04 | .75 to .89   | .85              | 0.03 | .78 to .91 |
| Dyspnoea              | Affect t-1                | -.22              | 0.04 | -.31 to -.14 | .18              | 0.04 | .10 to .26 |
|                       | Shortness of t-1          | .61               | 0.05 | .52 to .71   | .67              | 0.04 | .58 to .75 |
| Pain presence         | Affect t-1                | -.09 <sup>†</sup> | 0.03 | -.15 to -.03 | .09 <sup>†</sup> | 0.03 | .03 to .15 |
|                       | Pain t-1                  | .82               | 0.03 | .76 to .89   | .83              | 0.03 | .76 to .90 |

244 Standardised estimates of fixed covariates (residual symptom and (either positive or negative) affect)  
245 on outcome (symptom) in multivariate multilevel linear regression models. The first preceding  
246 measurement of each predictor is represented as t-1. All associations were statistically significant at  $p$   
247  $<.001$ , except for <sup>†</sup>:  $p = .006$ . SE = standard error; 95%CI = 95% confidence intervals presented with  
248 respectively lower and upper limits.

## 249 **Discussion**

250           This study explored the daily courses of and interrelations between affect and post-COVID-19  
251 symptoms using an ESM approach. The main finding was that both positive and negative affect  
252 predicted symptom severity both concurrently and two hours later. Moreover, post-COVID-19  
253 symptoms were found to fluctuate in severity both within and between days, and these severities  
254 fluctuated in co-occurrence with each other.

255           This study showed that affect might play a role in the experience of post-COVID-19 symptom  
256 severity. This finding is in line with expectations that symptom severity is reduced in occurrence with  
257 and after positive affect, which is based on the Broaden-and-Build framework [14]. Moreover, the  
258 results are in accordance with previous findings on the relationships between trait affect and fatigue,  
259 dyspnoea and pain in other patient populations [17, 20, 21, 37]. Furthermore, they are comparable to  
260 findings in functional somatic syndromes such as fibromyalgia and chronic fatigue syndrome. For these  
261 syndromes, it has been reported that negative affective states and negative trait affect elicit increased  
262 symptom severity [22, 38], and that positive trait affect was associated with decreased symptom severity  
263 [22]. The present study suggests that similar affect – symptom relationships also exist in post-COVID-  
264 19 patients, and adds to the understanding that these relationships occur on a momentary level and have  
265 short-term persisting effects by showing that small to medium effects of positive and negative affect on  
266 symptoms can also be observed two hours later.

267           Based on visual assessment, a difference in the relationship of positive and negative affect with  
268 symptom severity was observed. Negative affect was mostly consistent within two participants, while  
269 positive affect fluctuated more often and co-occurred with fluctuating symptom severity. This might  
270 suggest that there are important between- and within-individual differences. Previous findings in a  
271 general population showed that relationships between affect and somatic symptoms are better explained  
272 on a between-individual level by negative affect and on a within-individual level by positive affect [39].  
273 Consequently, future studies on the relationships between affect or psychological issues (such as  
274 depression, anxiety or uncertainty) and post-COVID-19 symptoms should account for within-individual  
275 differences that may be obscured by between-individual findings. Moreover, for treatment, this indicates

## Affect and Post-COVID-19 Symptoms in Daily Life

276 that different (affect-related) psychological approaches might be necessary and promising when dealing  
277 with symptom (self-)management.

278 Results also showed between- and within-individual differences in symptom severity. Not all  
279 participants experienced the same symptoms, and did not experience these symptoms at similar times.  
280 Moreover, no clear temporal trajectories could be observed in patients who experienced certain  
281 symptoms. For example, participants either experienced always severe or no dyspnoea, or the severity  
282 fluctuated for – as of yet – undetermined reasons (S2). Aside from small influences of affect, these  
283 fluctuations may be partially explained by exertion and daily activities, as previously explored for  
284 physical and mental fatigue in this sample [25].

285 Overall, present symptoms seemed to mostly co-occur, as they associated positively with each  
286 other over time within this sample– especially within somatic symptoms. Previously, it was shown using  
287 cross-sectional measures that many post-COVID-19 patients experience multiple symptoms (e.g.  
288 combinations of fatigue and pain, respiratory issues, and cognitive problems) at the same time, adding  
289 to the experienced disease burden [3]. The current study adds to the understanding that symptoms might  
290 influence each other’s severity. Interestingly, these associations could also be beneficial for patients, as  
291 it suggests that successfully targeting one symptom (e.g. dyspnoea) for an intervention might also result  
292 in a reduction in other symptoms (e.g. physical fatigue and pain). Although the present study cannot  
293 provide full evidence for this, these general trends may indicate that in accordance with the Broaden-  
294 and-Build framework and previous empirical findings that investigated sum score measures of  
295 symptoms [e.g., 39, 40], an overall increased well-being might similarly result in an overall decrease in  
296 symptom severity.

297 Taken together, our findings, especially on the role of positive affect, may serve as ground for  
298 exploration of an affect-based intervention, such as a positive psychological intervention (PPI). PPI have  
299 been found to be effective especially in chronic pain management and self-regulation [41, 42], and in  
300 reducing distress [43]. Therefore, they seem useful for post-COVID-19 symptom management.  
301 Additionally, an advantage of PPI is that they may provide participants with a sense of control over their  
302 rehabilitation. Perceived control was found to be severely impacted in post-COVID-19 patients [13].  
303 Moreover, the effects of PPI are quickly noticeable by participants [see e.g. 44]. To make best use of

## Affect and Post-COVID-19 Symptoms in Daily Life

304 these interventions, tailoring to participants' needs might be necessary. Given the temporal association  
305 between (positive) affect and symptom severity, tailored adaptive interventions that identify specific  
306 times at which PPI could best take place (e.g. just-in-time adaptive interventions) seem promising.  
307 Future studies should explore the best targets for these times, or whether these interventions should even  
308 be time-based.

309 The strength of this study is the experience sampling methodology, which allowed for an in-  
310 depth exploration of real-time assessed affect and symptom severity, increasing the reliability and  
311 ecological validity [23]. Moreover, by plotting participants' individual experiences of affect and  
312 symptoms over the day, a deep understanding was gained. Although this analytical strategy compensated  
313 for the small sample, the sample size can be seen as a limitation. Care should be taken to generalise the  
314 results. Evidence for temporal symptom patterns and stronger affect variability or instability may have  
315 arisen in a larger sample. Moreover, while the number of observations included was high, an average  
316 response rate of 60% is – while acceptable for ESM studies [23, 26] – rather low. Additionally, the  
317 sample was mostly homogeneous and consisted of patients with a relatively long course of post-COVID-  
318 19 syndrome following COVID-19 hospitalisation. Participants may have already learnt to live with  
319 their illness, as well as how to deal with certain negative emotions. Consequently, more recently  
320 diagnosed patients may experience more negative affect or higher symptom severity. Similarly, the  
321 effects of (the number of) vaccinations have not been accounted for. These have been shown to produce  
322 certain ameliorating effects on post-COVID-19 syndrome [45].

323

## 324 **Conclusions**

325 This study used an Experience Sampling Methodology to assess the temporal courses of and  
326 relations between affect and symptoms in the post-COVID-19 patients. It provided important insights  
327 in the momentary and prospective interactions between affect and post-COVID-19 symptoms. Both  
328 positive and negative affect play small but important roles in the severity of fatigue, cognitive  
329 dysfunction and dyspnoea and the presence of pain. Future studies should replicate and further explore

## Affect and Post-COVID-19 Symptoms in Daily Life

330 these associations in large and more diverse samples, to use insights for advanced psychological  
331 interventions for post-COVID-19 patients.

332

## 333 Acknowledgements

334 The authors thank Peter ten Klooster for his advice and support in data management and the statistical  
335 analyses.

336

## 337 References

338 1. National Institute for Health and Care Excellence. COVID-19 Rapid Guideline: Managing the  
339 long-term effects of COVID-19 2021 [updated November 11; cited 2023 May 22]. Available from:  
340 <https://www.nice.org.uk/guidance/ng188>.

341 2. Chen C, Hauptert SR, Zimmermann L, Shi X, Fritsche LG, Mukherjee B. Global Prevalence of  
342 Post-Coronavirus Disease 2019 (COVID-19) Condition or Long COVID: A Meta-Analysis and  
343 Systematic Review. *J Infect Dis.* 2022;226(9):1593-607. doi: 10.1093/infdis/jiac136. PubMed PMID:  
344 35429399; PubMed Central PMCID: PMCPMC9047189.

345 3. Global Burden of Disease Long COVID Collaborators. Estimated Global Proportions of  
346 Individuals With Persistent Fatigue, Cognitive, and Respiratory Symptom Clusters Following  
347 Symptomatic COVID-19 in 2020 and 2021. *JAMA.* 2022;328(16):1604-15. doi:  
348 10.1001/jama.2022.18931.

349 4. O'Mahoney LL, Routen A, Gillies C, Ekezie W, Welford A, Zhang A, et al. The prevalence  
350 and long-term health effects of Long Covid among hospitalised and non-hospitalised populations: A  
351 systematic review and meta-analysis. *EClinicalMedicine.* 2023;55:101762. Epub 20221201. doi:  
352 10.1016/j.eclinm.2022.101762. PubMed PMID: 36474804; PubMed Central PMCID:  
353 PMCPMC9714474.

354 5. Lopez-Leon S, Wegman-Ostrosky T, Perelman C, Sepulveda R, Rebolledo PA, Cuapio A, et  
355 al. More than 50 Long-term effects of COVID-19: a systematic review and meta-analysis. medRxiv.

## Affect and Post-COVID-19 Symptoms in Daily Life

- 356 2021. Epub 2021/02/04. doi: 10.1101/2021.01.27.21250617. PubMed PMID: 33532785; PubMed  
357 Central PMCID: PMC7852236 Company; the statements presented in the paper do not  
358 necessarily represent the position of the company. The remaining authors have no competing interests  
359 to declare.
- 360 6. Malik P, Patel K, Pinto C, Jaiswal R, Tirupathi R, Pillai S, et al. Post-acute COVID-19  
361 syndrome (PCS) and health-related quality of life (HRQoL)—A systematic review and meta-analysis.  
362 J Med Virol. 2022;94(1):253-62. doi: 10.1002/jmv.27309.
- 363 7. Cabrera Martimbianco AL, Pacheco RL, Bagattini ÂM, Riera R. Frequency, signs and  
364 symptoms, and criteria adopted for long COVID-19: A systematic review. Int J Clin Pract.  
365 2021;75(10):e14357-e. Epub 2021/06/02. doi: 10.1111/ijcp.14357. PubMed PMID: 33977626.
- 366 8. Domingo FR, Waddell LA, Cheung AM, Cooper CL, Belcourt VJ, Zuckermann AME, et al.  
367 Prevalence of long-term effects in individuals diagnosed with COVID-19: an updated living  
368 systematic review. medRxiv. 2021:2021.06.03.21258317. doi: 10.1101/2021.06.03.21258317.
- 369 9. Michelen M, Manoharan L, Elkheir N, Cheng V, Dagens A, Hastie C, et al. Characterising  
370 long COVID: a living systematic review. BMJ Glob Health. 2021;6(9):e005427. doi: 10.1136/bmjgh-  
371 2021-005427. PubMed PMID: 34580069.
- 372 10. Ladds E, Rushforth A, Wieringa S, Taylor S, Rayner C, Husain L, et al. Persistent symptoms  
373 after Covid-19: qualitative study of 114 "long Covid" patients and draft quality principles for services.  
374 BMC Health Serv Res. 2020;20(1):1144. Epub 2020/12/22. doi: 10.1186/s12913-020-06001-y.  
375 PubMed PMID: 33342437; PubMed Central PMCID: PMC7750006.
- 376 11. Buttery S, Philip KEJ, Williams P, Fallas A, West B, Cumella A, et al. Patient symptoms and  
377 experience following COVID-19: Results from a UK-wide survey. BMJ Open Respiratory Research.  
378 2021;8(1). doi: 10.1136/bmjresp-2021-001075.
- 379 12. Humphreys H, Kilby L, Kudiersky N, Copeland R. Long COVID and the role of physical  
380 activity: a qualitative study. BMJ Open. 2021;11(3):e047632. doi: 10.1136/bmjopen-2020-047632.
- 381 13. Schaap G, Wensink M, Doggen CJM, van der Palen J, Vonkeman HE, Bode C. "It Really Is  
382 an Elusive Illness"- Post-COVID-19 Illness Perceptions and Recovery Strategies: A Thematic  
383 Analysis. Int J Environ Public Health. 2022;19(20):13003. doi: 10.3390/ijerph192013003.



## Affect and Post-COVID-19 Symptoms in Daily Life

- 384 14. Fredrickson BL. The role of positive emotions in positive psychology. The broaden-and-build  
385 theory of positive emotions. *Am Psychol*. 2001;56(3):218-26. doi: 10.1037//0003-066x.56.3.218.  
386 PubMed PMID: 11315248; PubMed Central PMCID: PMCPMC3122271.
- 387 15. Fredrickson BL. The broaden-and-build theory of positive emotions. *Philosophical*  
388 *Transactions of the Royal Society of London Series B: Biological Sciences*. 2004;359(1449):1367-77.  
389 doi: 10.1098/rstb.2004.1512.
- 390 16. Frijda NH. *The emotions*. Paris, France: Editions de la Maison des Sciences de l'Homme;  
391 1986. xii, 544-xii, p.
- 392 17. von Leupoldt A, Denutte Y. Affective traits, states, and breathlessness. *Curr Opin Support*  
393 *Palliat Care*. 2020;14(3):182-9. doi: 10.1097/spc.0000000000000506. PubMed PMID: 01263393-  
394 202009000-00006.
- 395 18. Finan PH, Garland EL. The role of positive affect in pain and its treatment. *Clin J Pain*.  
396 2015;31(2):177-87. doi: 10.1097/AJP.0000000000000092.
- 397 19. Hanssen MM, Peters ML, Boselie JJ, Meulders A. Can positive affect attenuate (persistent)  
398 pain? State of the art and clinical implications. *Current Rheumatology Reports*. 2017;19(12):80. doi:  
399 10.1007/s11926-017-0703-3.
- 400 20. Ong AD, Thoemmes F, Ratner K, Ghezzi-Kopel K, Reid MC. Positive affect and chronic  
401 pain: a preregistered systematic review and meta-analysis. *PAIN*. 2020;161(6):1140-9. doi:  
402 10.1097/j.pain.0000000000001828. PubMed PMID: 00006396-202006000-00004.
- 403 21. Strebkova R. Subjective Well-Being and its Impact on Cancer-Related Fatigue in Patients  
404 Undergoing Radiotherapy and Long-Term Survivors. *Acta Medica Bulgarica*. 2020;47(4):18-23. doi:  
405 doi:10.2478/amb-2020-0040.
- 406 22. Toussaint LL, Vincent A, McAllister SJ, Oh TH, Hassett AL. A comparison of fibromyalgia  
407 symptoms in patients with Healthy versus Depressive, Low and Reactive affect balance styles. *Scand J*  
408 *Pain*. 2014;5(3):161-6. doi: 10.1016/j.sjpain.2014.05.001.
- 409 23. Myin-Germeys I, Kuppens P, editors. *The open handbook of experience sampling*  
410 *methodology: A step-by-step guide to designing, conducting, and analyzing ESM studies*. 2nd ed.  
411 Leuven: Center for Research on Experience Sampling and Ambulatory Methods Leuven; 2022.

## Affect and Post-COVID-19 Symptoms in Daily Life

- 412 24. Aaronson NK, Muller M, Cohen PDA, Essink-Bot M-L, Fekkes M, Sanderman R, et al.  
413 Translation, Validation, and Norming of the Dutch Language Version of the SF-36 Health Survey in  
414 Community and Chronic Disease Populations. *J Clin Epidemiol.* 1998;51(11):1055-68. doi:  
415 10.1016/S0895-4356(98)00097-3.
- 416 25. Wensink M, Schaap G, ten Klooster PM, Doggen CJM, van der Palen J, Vonkeman HE, et al.  
417 Physical and mental fatigue in post-COVID syndrome and their associations over time: A small-  
418 sample ESM-study to explore fatigue, quality of sleep and behaviours. *J Psychosom Res.*  
419 2023;164:111084. doi: <https://doi.org/10.1016/j.jpsychores.2022.111084>.
- 420 26. Conner TS, Lehman BJ. Launching a Study in Daily Life. In: Mehl M, Conner TS, editors.  
421 *Handbook of Research Methods for Studying Daily Life.* New York: Guilford Press; 2012. p. 88 - 107.
- 422 27. Brys ADH, Stiff F, Van Heugten CM, Bossola M, Gambaro G, Lenaert B. Unraveling Fatigue  
423 in Hemodialysis Patients: Comparing Retrospective Reports to Real-Time Assessments With an  
424 mHealth Experienced Sampling Method. *J Pain Symptom Manage.* 2020;60(6):1100-8.e2. doi:  
425 10.1016/j.jpainsymman.2020.06.042.
- 426 28. Dietvorst E, Hiemstra M, Maciejewski D, van Roekel E, Bogt Tt, Hillegers M, et al. Grumpy  
427 or depressed? Disentangling typically developing adolescent mood from prodromal depression using  
428 experience sampling methods. *J Adolesc.* 2021;88:25-35. doi: 10.1016/j.adolescence.2021.01.009.
- 429 29. Jean FAM, Sibon I, Husky M, Couffinhall T, Swendsen J. Feasibility and validity of  
430 Ecological Momentary Assessment in patients with acute coronary syndrome. *BMC Cardiovasc*  
431 *Disord.* 2020;20(1). doi: 10.1186/s12872-020-01774-w.
- 432 30. Kratz AL, Braley TJ, Foxen-Craft E, Scott E, Murphy JF, Murphy SL. How Do Pain, Fatigue,  
433 Depressive, and Cognitive Symptoms Relate to Well-Being and Social and Physical Functioning in the  
434 Daily Lives of Individuals With Multiple Sclerosis? *Arch Phys Med Rehabil.* 2017;98(11):2160-6.  
435 doi: 10.1016/j.apmr.2017.07.004.
- 436 31. Lenaert B, Neijmeijer M, van Kampen N, van Heugten C, Ponds R. Poststroke Fatigue and  
437 Daily Activity Patterns During Outpatient Rehabilitation: An Experience Sampling Method Study.  
438 *Arch Phys Med Rehabil.* 2020;101(6):1001-8. doi: 10.1016/j.apmr.2019.12.014. PubMed PMID:  
439 WOS:000543030600008.

## Affect and Post-COVID-19 Symptoms in Daily Life

- 440 32. Maes IHL, Delespaul PAEG, Peters ML, White MP, van Horn Y, Schruers K, et al. Measuring  
441 Health-Related Quality of Life by Experiences: The Experience Sampling Method. *Value Health*.  
442 2015;18(1):44-51. doi: 10.1016/j.jval.2014.10.003.
- 443 33. Romano KA, Heron KE, Smith KE, Crosby RD, Engel SG, Wonderlich SA, et al. Somatic  
444 symptoms and binge eating in women's daily lives. *J Psychosom Res*. 2020;135. doi:  
445 10.1016/j.jpsychores.2020.110161.
- 446 34. Worm-Smeitink M, Monden R, Groen RN, van Gils A, Bekhuis E, Rosmalen J, et al. Towards  
447 personalized assessment of fatigue perpetuating factors in patients with chronic fatigue syndrome  
448 using ecological momentary assessment: A pilot study. *J Psychosom Res*. 2021;140. doi:  
449 10.1016/j.jpsychores.2020.110296.
- 450 35. Posit Team. *RStudio: Integrated Development Environment for R*: Posit Software, PBC; 2023.  
451 Available from: <https://posit.co/>.
- 452 36. Cohen J. *Statistical Power Analysis for the Behavioural Sciences*: Academic Press, New York;  
453 1988.
- 454 37. Zautra AJ, Fasman R, Parish BP, Davis MC. Daily fatigue in women with osteoarthritis,  
455 rheumatoid arthritis, and fibromyalgia. *Pain*. 2007;128(1):128-35. doi: 10.1016/j.pain.2006.09.004.
- 456 38. Van Den Houte M, Bogaerts K, Van Diest I, De Bie J, Persoons P, Van Oudenhove L, et al.  
457 Inducing Somatic Symptoms in Functional Syndrome Patients: Effects of Manipulating State Negative  
458 Affect. *Psychosom Med*. 2017;79(9):1000-7. doi: 10.1097/psy.0000000000000527. PubMed PMID:  
459 00006842-201711000-00007.
- 460 39. Schenk HM, Bos EH, Slaets JPI, de Jonge P, Rosmalen JGM. Differential association between  
461 affect and somatic symptoms at the between- and within-individual level. *Br J Health Psychol*.  
462 2017;22(2):270-80. doi: 10.1111/bjhp.12229.
- 463 40. Clark LA, Watson D. Mood and the mundane: relations between daily life events and self-  
464 reported mood. *J Pers Soc Psychol*. 1988;54(2):296-308. doi: 10.1037//0022-3514.54.2.296. PubMed  
465 PMID: 3346815.

## Affect and Post-COVID-19 Symptoms in Daily Life

- 466 41. Braunwalder C, Müller R, Glisic M, Fekete C. Are Positive Psychology Interventions  
467 Efficacious in Chronic Pain Treatment? A Systematic Review and Meta-Analysis of Randomized  
468 Controlled Trials. *Pain Med.* 2021;23(1):122-36. doi: 10.1093/pm/pnab247.
- 469 42. Iddon JE, Dickson JM, Unwin J. Positive Psychological Interventions and Chronic Non-  
470 Cancer Pain: A Systematic Review of the Literature. *Int J Appl Posit Psychol.* 2016;1(1):133-57. doi:  
471 10.1007/s41042-016-0003-6.
- 472 43. Chakhssi F, Kraiss JT, Sommers-Spijkerman M, Bohlmeijer ET. The effect of positive  
473 psychology interventions on well-being and distress in clinical samples with psychiatric or somatic  
474 disorders: a systematic review and meta-analysis. *BMC Psychiatry.* 2018;18(1):211. Epub 20180627.  
475 doi: 10.1186/s12888-018-1739-2. PubMed PMID: 29945603; PubMed Central PMCID:  
476 PMCPMC6020379.
- 477 44. Geschwind N, Arntz A, Bannink F, Peeters F. Positive cognitive behavior therapy in the  
478 treatment of depression: A randomized order within-subject comparison with traditional cognitive  
479 behavior therapy. *Behav Res Ther.* 2019;116:119-30. Epub 20190309. doi:  
480 10.1016/j.brat.2019.03.005. PubMed PMID: 30897464.
- 481 45. Tofarides AG, Christaki E, Milionis H, Nikolopoulos GK. Effect of Vaccination against  
482 SARS-CoV-2 on Long COVID-19: A Narrative Review. *Life (Basel).* 2022;12(12). Epub 20221208.  
483 doi: 10.3390/life12122057. PubMed PMID: 36556422; PubMed Central PMCID: PMCPMC9785763.  
484

## 485 **Supporting information**

486 **S1. Morning and momentary questionnaires**

487 **S2. Visualisations of courses of symptoms with concurrent affect**

488 **S3. Visualisations of courses of symptoms with time-lagged affect**

489 **S4. Visualisations of courses of affect and of specified pains**

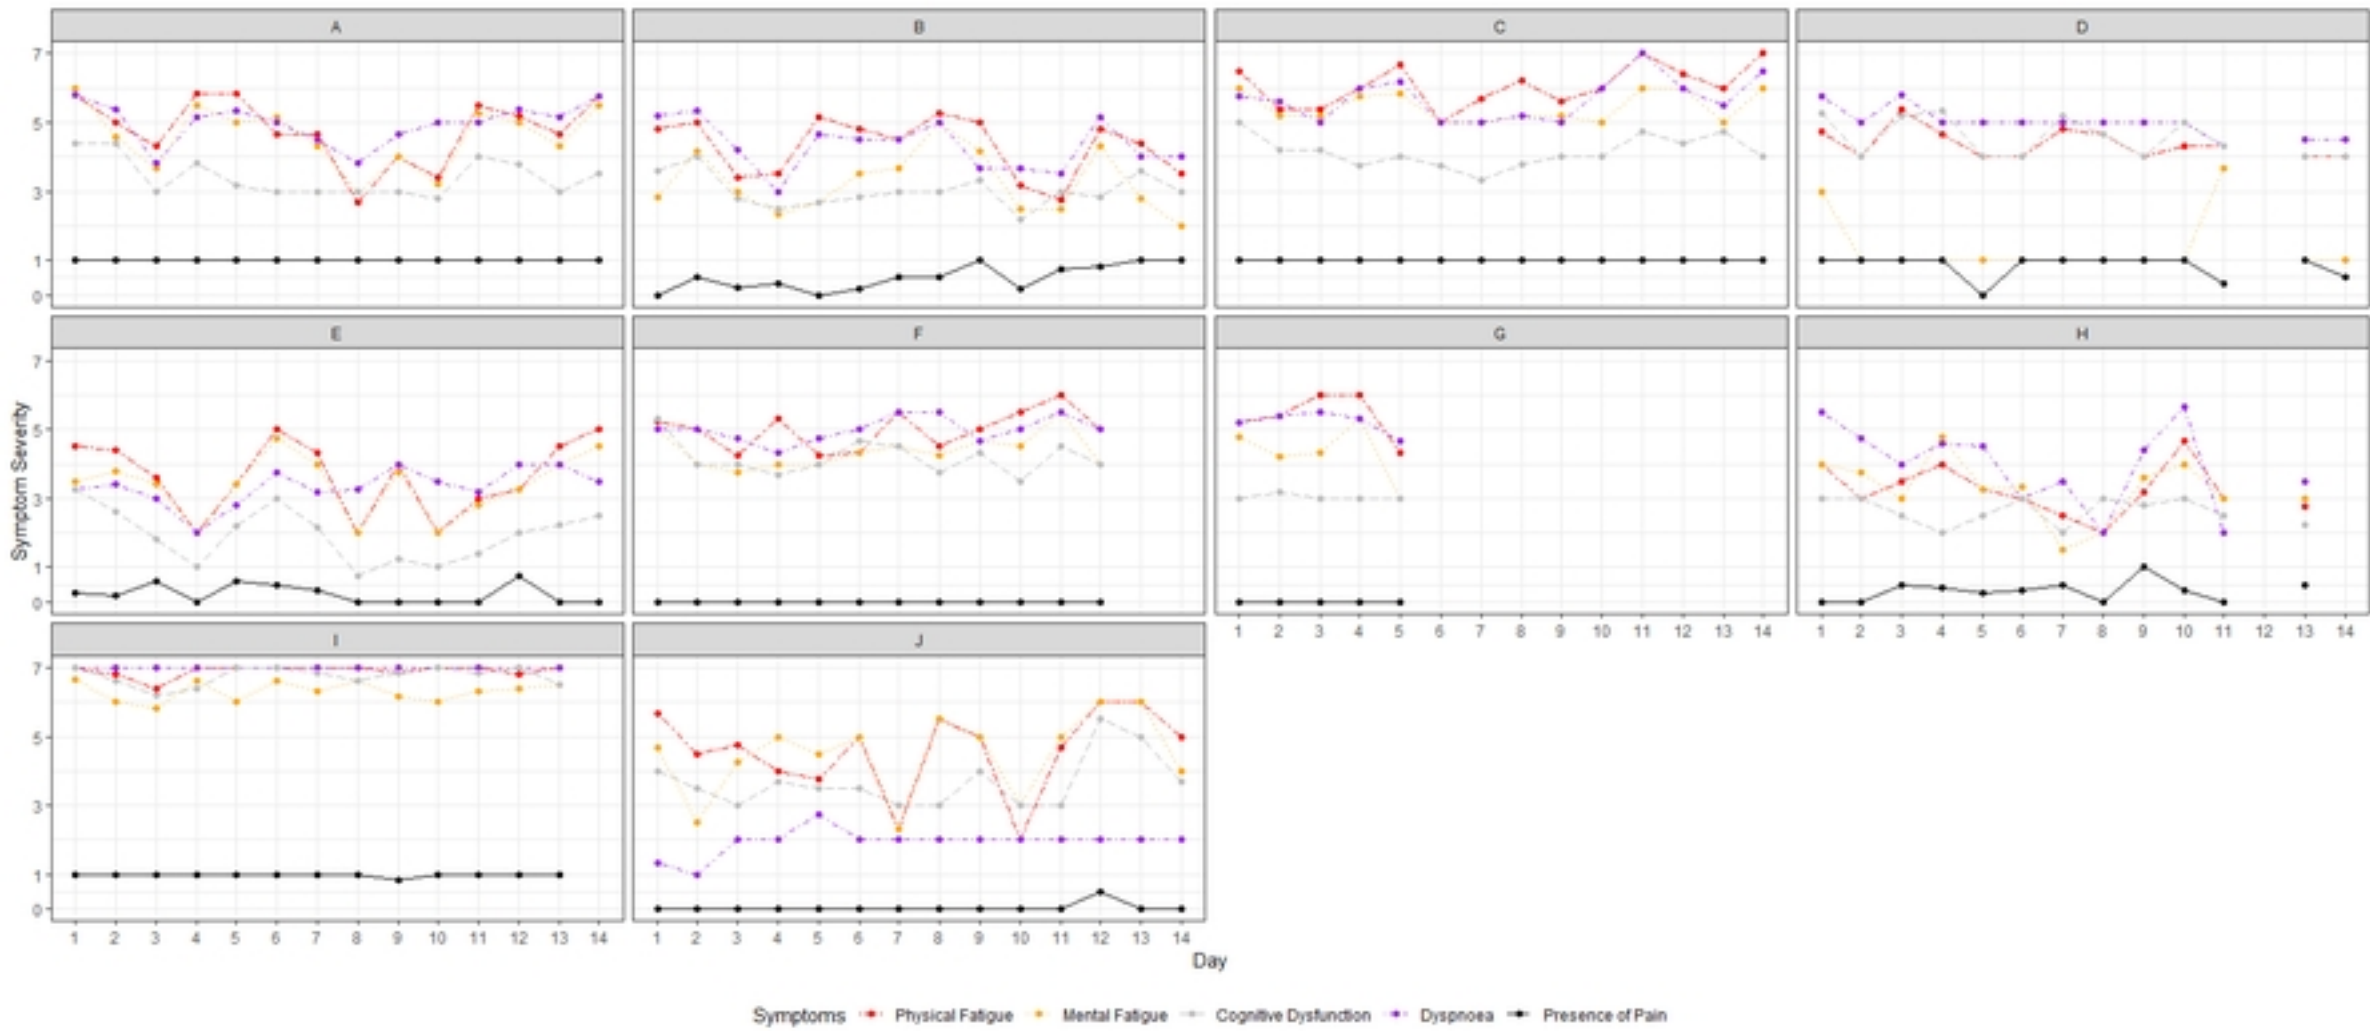

Fig 1

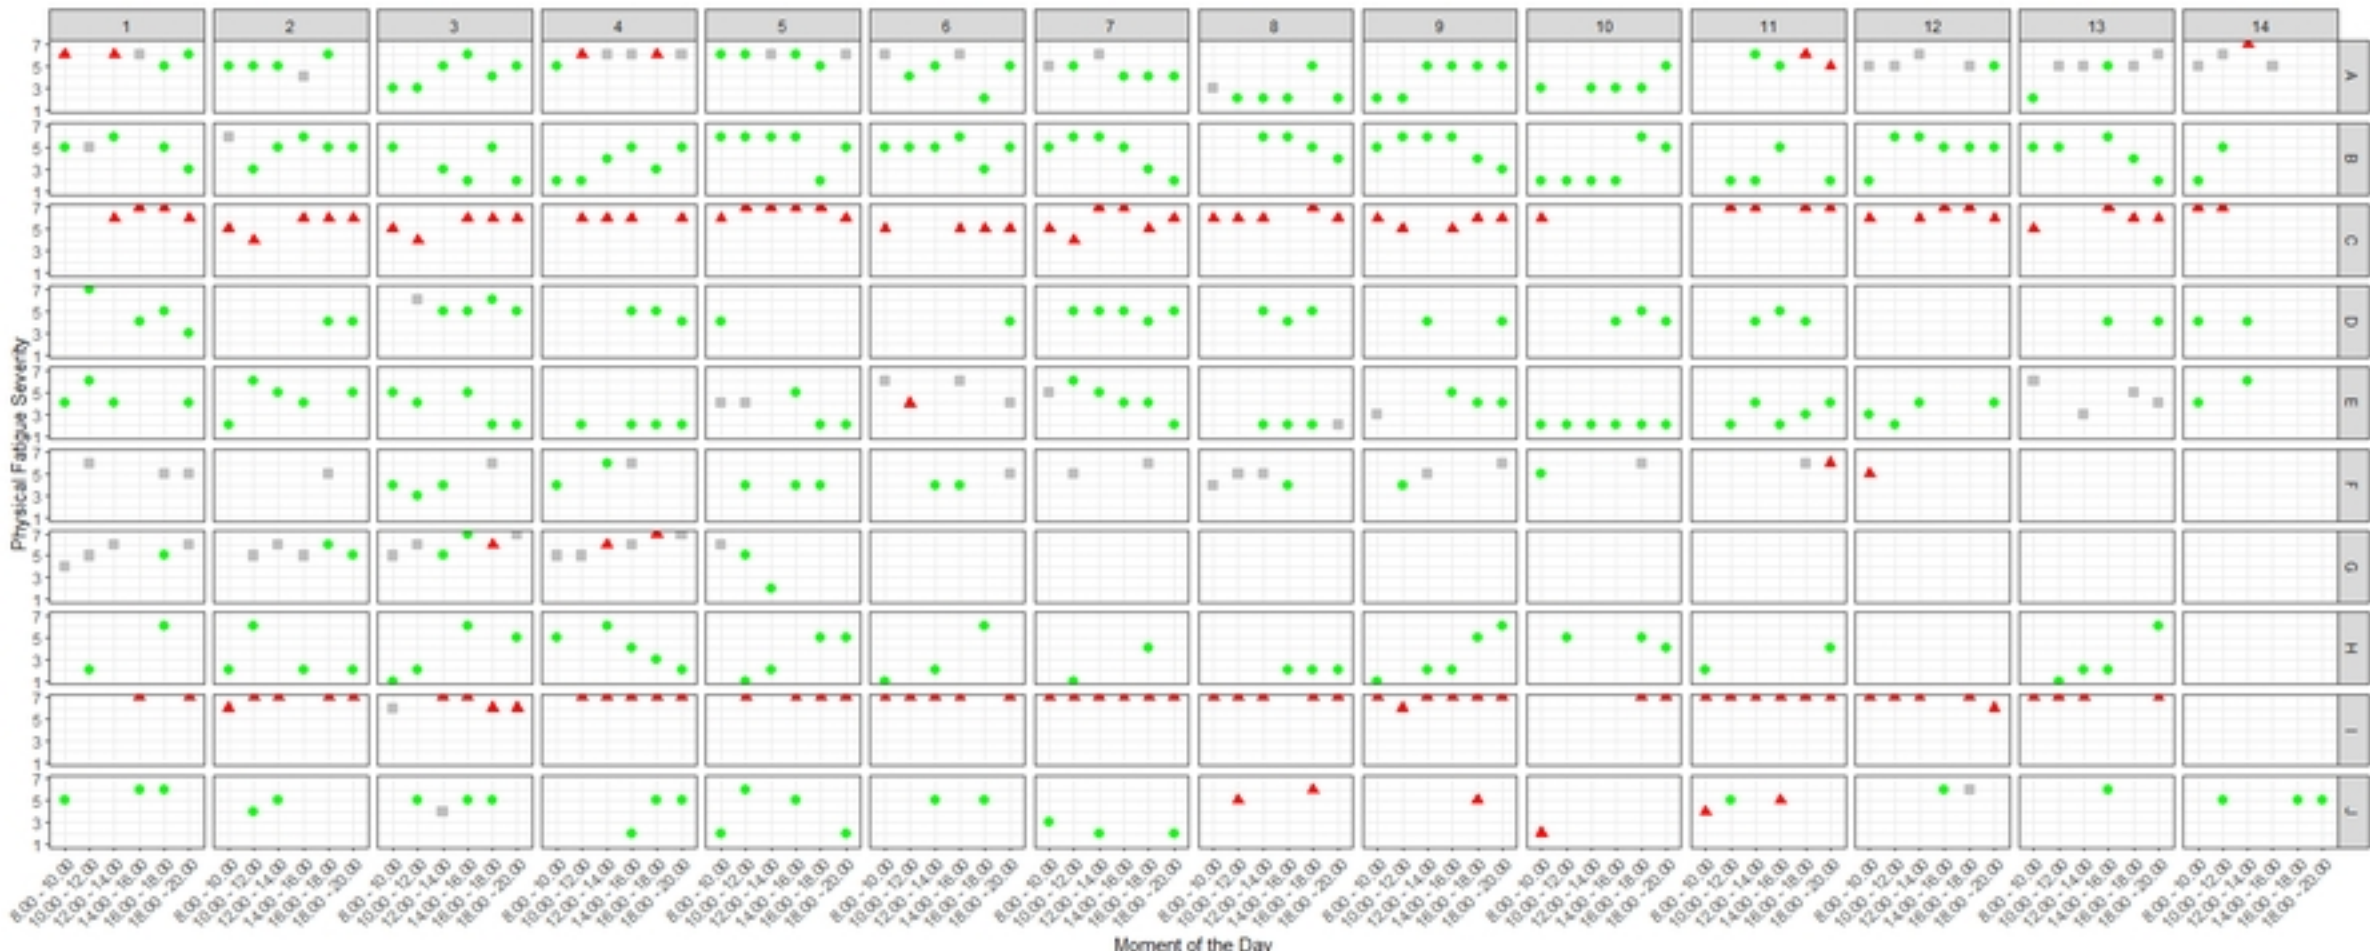

Affect at Corresponding Time ● Predominantly positive ▲ Predominantly negative ■ Neither positive nor negative
